# Supplementary material for: Therapeutic potential of resveratrol: the in vivo evidence
Source: Springer Nature journal article supplement (doi:10.1038/nrd2060), 2006-05-26
Supplement: 41573_2006_BFnrd2060_MOESM1_ESM.pdf [file 41573_2006_BFnrd2060_MOESM1_ESM.pdf]

### ***In vivo* effects of resveratrol.**

| Species       | Assay                                                                         | Daily Dose                        | Route          | Result                                                                                                                                                         | Refs |
|---------------|-------------------------------------------------------------------------------|-----------------------------------|----------------|----------------------------------------------------------------------------------------------------------------------------------------------------------------|------|
| <i>Cancer</i> |                                                                               |                                   |                |                                                                                                                                                                |      |
| Hamster       | N-nitrosobis(2-oxopropyl)amine-induced pancreatic cancer                      | 10 ppm                            | diet           | no significant effect on the multiplicities of pancreatic lesions                                                                                              | 1    |
| Mouse         | s.c. implanted MDA-MB-231 human breast cancer                                 | 25 mg/kg                          | i.p.           | decreased tumor size and microvessel density, increased apoptotic index                                                                                        | 2    |
| Rat           | 1,2-dimethylhydrazine-induced colon carcinogenesis                            | 8 mg/kg                           | per os         | reduced tumor incidence and size, and degree of histological lesions, blocked the rise in liver TBARS and fall in colonic mucosa TBARS when given continuously | 3    |
| Mouse         | UVB-induced skin cancer                                                       | 25, 50 $\mu$ mol                  | top.           | delayed onset and decreased incidence of tumorigenesis whether resveratrol was applied pre- or post-UVB                                                        | 4    |
| Rat           | potential chemopreventive effects                                             | 50, 300 mg/kg                     | diet           | increased plasma antioxidant capacity, non-significant increase in glutathione-S-transferase activity, no change in vitamin E status                           | 5    |
| Mouse         | spontaneous development of mammary tumors                                     | ~ 0.2 mg/kg                       | d.w.           | delayed tumor development, decreased size and number of tumors, lung metastases, and HER-2/neu expression, increased apoptosis                                 | 6    |
| Mouse         | intestinal tumor load in familial adenomatous polyposis                       | ~ 60, 240 mg/kg                   | diet           | decreased number of adenomas (240 mg/kg), and PGE <sub>2</sub> in intestinal mucosa                                                                            | 7    |
| Mouse         | s.c. implanted human primary gastric carcinoma                                | 500, 1000, 1500 /48 h             | inj.           | inhibited tumor growth, increased apoptosis                                                                                                                    | 8    |
| Mouse         | UVB exposure                                                                  | 10 $\mu$ mol                      | top.           | decreased edema, hyperplasia, leukocyte infiltration, cell cycle proteins, increased p21 and p53                                                               | 9    |
| Mouse         | benzo[a]pyrene (BaP)-induced lung tumorigenesis                               | 6-8 mg/kg                         | diet           | no change in tumor incidence or multiplicity, CYP1A1 or IB1 expression, or BaP protein adducts                                                                 | 10   |
| Mouse         | hepatic implanted H22 hepatoma                                                | 10, 15 mg/kg                      | abd.           | 36.3%, 49.3% reduction in tumor size, further enhanced by 5-FU                                                                                                 | 11   |
| Mouse         | CTX-induced micronucleus formation, DMBA/croton oil-induced skin cancer       | 25, 50, 100 mg/kg                 | gav.           | decreased micronucleus formation, ODC activity, and incidence and multiplicity of papillomas, increased latency                                                | 12   |
| Mouse         | s.c. implanted neuro-2a neuroblastoma                                         | 40 mg/kg                          | i.p.           | slowed growth, increased survival from 0 to 70%                                                                                                                | 13   |
| Mouse         | markers of proliferation and tumor development in skin following UVB exposure | 10 $\mu$ mol                      | top.           | blocked increases in proliferation (Ki-67 immunostaining), COX and ODC activity, and mRNA and phosphorylation levels of survivin                               | 14   |
| Mouse         | COX and ODC activity in liver and lungs before and after NDEA treatment       | 2.5 mg/kg                         | oral           | decreased ODC and COX activity, blocked induction of ODC and COX by NDEA                                                                                       | 15   |
| Mouse         | intestinal tumor load in familial adenomatous polyposis                       | 4, 20, 90 mg/kg                   | diet           | non-significant decrease in small intestinal tumors, no effect on large intestinal tumors, decrease in PGE <sub>2</sub> in tumor                               | 16   |
| Rat           | s.c. and intracerebral implanted RT-2 gliomas                                 | 10, 40, 100 mg/kg                 | i.p.           | slowed tumor growth, angiogenesis, increased apoptosis, host survival for subcutaneous and intracerebral (100 mg/kg) tumors                                    | 17   |
| Mouse         | UVB irradiation                                                               | 25 $\mu$ mol                      | top.           | decreased edema, leukocyte infiltration, COX and ODC activity, and oxidative damage                                                                            | 18   |
| Rat           | prepubertal MNU-induced mammary carcinomas (post-resveratrol)                 | 10, 100 mg/kg                     | s.c.           | 10 mg/kg ineffective, 100 mg/kg increased tumor incidence                                                                                                      | 19   |
| Rat           | s.c. implanted AH109A hepatoma                                                | ~ 1, 5 mg/kg                      | diet           | decreased levels of LDL, VLDL, and lipid peroxide, non-significant decrease in tumor growth                                                                    | 20   |
| Mouse         | hepatic implanted H22 hepatoma                                                | 5, 10, 15 mg/kg                   | abd.           | decreased tumor size (10, 15 mg/kg), cyclin B1 and p34cdc2                                                                                                     | 21   |
| Rat           | lymphocytic DNA integrity                                                     | 1-100 mg/kg                       | diet           | increased lymphocytic DNA damage                                                                                                                               | 22   |
| Mouse         | benzo[a]pyrene-induced lung damage                                            | 50 /wk                            | inj.           | reduced DNA-adduct formation, CYP1A1 expression, and apoptosis                                                                                                 | 23   |
| Mouse         | implanted (right axilla) H22 hepatoma                                         | 500, 1000, 1500 mg/kg             | i.p.           | 31.5%, 45.6%, 48.7% reduction in tumor size                                                                                                                    | 24   |
| Mouse         | DMBA-induced, TPA-promoted skin cancer                                        | 1, 5, 10, 25 $\mu$ mol (twice/wk) | top.           | decreased tumor formation (ED <sub>50</sub> ~ 6 $\mu$ mol)                                                                                                     | 25   |
| Rat           | DMBA-induced mammary carcinogenesis                                           | ~ 12-15 mg/kg                     | diet           | no effect on body weight, decreased incidence and multiplicity of tumors, COX-2, MMP-9, and NF $\kappa$ B activity                                             | 26   |
| Rat           | NMBA-induced esophageal tumorigenesis                                         | 1, 2 mg/kg                        | per os or i.p. | reduced number and size of tumors, non-significant decrease in tumor incidence, decreased COX-1, COX-2, and PGE <sub>2</sub>                                   | 27   |
| Mouse         | foodpad or intrasplenic implanted B16M melanoma                               | 20 (twice/day) or 23 mg/L         | oral or d.w.   | ineffective for solid tumor, decreased hepatic invasion, no effect on host survival                                                                            | 28   |
| Mouse         | implanted 32Dp210 myeloid leukemia                                            | 8, 40, 80 mg/kg (5                | oral           | non-significant increase in survival at 80 mg/kg (2/14 animals vs. 0 in other groups)                                                                          | 29   |

|                      |                                                                                                                                                                                    |                                  |      |                                                                                                                                                                                                                                               |    |
|----------------------|------------------------------------------------------------------------------------------------------------------------------------------------------------------------------------|----------------------------------|------|-----------------------------------------------------------------------------------------------------------------------------------------------------------------------------------------------------------------------------------------------|----|
|                      |                                                                                                                                                                                    | days/wk)                         |      |                                                                                                                                                                                                                                               |    |
| Mouse                | s.c. implanted 4T1 breast cancer                                                                                                                                                   | 1, 3, 5 mg/kg                    | i.p. | no effect on tumor growth, metastasis, body weight, organ histology, or estrous cycling                                                                                                                                                       | 30 |
| Mouse                | benzo[a]pyrene (BaP)-induced sperm damage                                                                                                                                          | 50 /wk                           | s.c. | decreased DNA adducts and apoptosis                                                                                                                                                                                                           | 31 |
| Rat                  | <i>N</i> -methyl- <i>N</i> -nitrosourea-induced mammary tumorigenesis                                                                                                              | 10, 100 mg/kg (5 days/wk)        | i.g. | no effect on body weight, decreased incidence and increased latency of tumors (100 mg/kg)                                                                                                                                                     | 32 |
| Mouse                | intestinal tumor load in familial adenomatous polyposis                                                                                                                            | 0.3-0.4 mg                       | d.w. | decreased incidence of tumors in large and small intestine, and expression of cell cycle proteins                                                                                                                                             | 33 |
| Mouse                | s.c. implanted T241 fibrosarcoma                                                                                                                                                   | 1 mg/kg                          | d.w. | decreased tumor growth                                                                                                                                                                                                                        | 34 |
| Mouse                | s.c. implanted Lewis lung carcinoma                                                                                                                                                | 0.6, 2.5, 10 mg/kg               | i.p. | decreased tumor volume, weight, metastasis, and neovascularization (2.5, 10 mg/kg)                                                                                                                                                            | 35 |
| Mouse                | intramuscular implanted B16-BL6 melanoma                                                                                                                                           | 50 mg/kg                         | i.p. | decreased tumor volume, no effect on body weight, mortality, or lung colonization                                                                                                                                                             | 36 |
| Rat                  | (AOM)-induced colorectal aberrant crypt foci (ACF)                                                                                                                                 | 0.2 mg/kg                        | d.w. | reduced number and multiplicity of ACF, increased bax, decreased p21 in normal mucosa                                                                                                                                                         | 37 |
| Mouse                | lung tumorigenesis induced by a mixture of benzo[a]pyrene and 4-(methyl-nitrosoamino)-1-(3-pyridyl)-1-butanone                                                                     | 500 ppm                          | diet | no effect on body weight, incidence or multiplicity of tumors                                                                                                                                                                                 | 38 |
| Rat                  | innoculated Yoshida AH-130 ascites hepatoma                                                                                                                                        | 1 mg/kg                          | i.p. | 25% decrease in tumor cell number, increase in G <sub>2</sub> /M cells, appearance of an aneuploid peak                                                                                                                                       | 39 |
| Mouse                | DMBA initiated, TPA-promoted skin cancer                                                                                                                                           | 1, 5, 10, 15 μmol (twice weekly) | top. | decrease in multiplicity (98%) and incidence (88%) of skin tumors                                                                                                                                                                             | 40 |
| <i>Heart Disease</i> |                                                                                                                                                                                    |                                  |      |                                                                                                                                                                                                                                               |    |
| Rat                  | cardiac hypertrophy induced by partial nephrectomy                                                                                                                                 | 10, 50 mg/kg                     | gav. | decreased systolic blood pressure, heart weight, and serum endothelin and angiotensin II concentrations, increased serum NO                                                                                                                   | 41 |
| Rat, Guinea Pig      | aconitine, ouabain, and coronary ligation-induced arrhythmia                                                                                                                       | 5, 15, 45 mg/kg                  | i.v. | increased the amount of aconitine or ouabain required to cause arrhythmia, decreased arrhythmia, ventricular tachycardia, and mortality following coronary ligation                                                                           | 42 |
| Rabbit               | development of atherosclerosis on a 1.5% cholesterol diet                                                                                                                          | 3 mg/kg                          | d.w. | no effect on plasma cholesterol or triglycerides, decreased atherosclerotic plaques and thickness of the intima layer in thoracic aorta, prevented loss of flow-mediated dilation                                                             | 43 |
| Rat                  | permanent left anterior descending coronary artery occlusion                                                                                                                       | 1 mg/kg                          | d.w. | reduced infarct size, increased capillary density, thioredoxin-1, heme oxygenase-1 (HO-1), and VEGF expression in heart, and improved ventricular function, all effects except thioredoxin-1 and HO-1 expression blocked by an HO-1 inhibitor | 44 |
| Rat                  | fructose-induced biochemical cardiovascular changes                                                                                                                                | 10 mg/kg                         | gav. | prevented the increase in systolic blood pressure, cardiac hypertrophy, and TBARS, restored mesenteric and cardiac eNOS,                                                                                                                      | 45 |
| Hamster              | aortic fatty streak accumulation                                                                                                                                                   | 0.1428 mg/kg                     | gav. | decreased aortic fatty streak area and serum cholesterol, no effect on plasma antioxidant capacity or apolipoprotein-B, nonsignificant increase in apolipoprotein-A1                                                                          | 46 |
| Hamster              | development of atherosclerosis on an atherogenic diet                                                                                                                              | 0.1428 mg/kg                     | gav. | decreased aortic fatty acid streak area, nonsignificant decrease in apolipoprotein A1, no effect on plasma antioxidant capacity                                                                                                               | 47 |
| Mouse                | atherothrombotic tendency after laser-induced damage to endothelium                                                                                                                | 9.6, 96 mg/kg                    | diet | ~30% reduction in atheroma, ~25% decrease in thrombus size, no change in plasma lipids                                                                                                                                                        | 48 |
| Guinea Pig           | cardiac DT-diaphorase and catalase activity, menadione-induced ROS                                                                                                                 | ~ 14 mg/kg                       | d.w. | increased DT-diaphorase and catalase, decrease in menadione-induced ROS                                                                                                                                                                       | 49 |
| Rabbit               | endothelial function on a hypercholesterolemic diet                                                                                                                                | 3 mg/kg                          | i.g. | improved flow-mediated dilation, partially blocked decrease in nitric oxide and increase in endothelin 1                                                                                                                                      | 50 |
| Rat                  | inflammatory responses in mesenteries exposed to ischemia/reperfusion (IR), hypoxanthine/xanthine oxidase (HX/XO), platelet activating factor (PAF), or leukotriene B <sub>4</sub> | 0.7 mg/kg                        | inj. | reduction in adherent and emigrated leukocytes and venular albumin leakage in response to IR, HX/XO, and PAF, but not leukotriene B <sub>4</sub>                                                                                              | 51 |
| Rabbit               | platelet aggregation on a hypercholesterolemic diet                                                                                                                                | 4 mg/kg                          | i.g. | reduced platelet aggregation, no effect on LDL, HDL, or total cholesterol                                                                                                                                                                     | 52 |
| Rabbit               | serum lipids and platelet aggregation on a hypercholesterolemic diet                                                                                                               | 4 mg/kg                          | i.g. | blocked increases in platelet aggregation, no effect on total cholesterol, LDL, HDL, or triglycerides                                                                                                                                         | 53 |
| Mouse                | TNFα-induced vascular leakage (by liver perfusion with trypan blue)                                                                                                                | 1 μM                             | i.p. | complete block of TNFα-induced vascular leakage                                                                                                                                                                                               | 54 |
| Rat                  | urinary and plasma markers of oxidative stress in both genders                                                                                                                     | 1 mg/kg                          | i.g. | decrease in urinary 8-hydroxyguanosine and plasma glycated albumin, non-significant decrease in hydroperoxide, no change in food intake, b.w., blood pressure, glucose, lipids, albumin                                                       | 55 |
| Rat                  | lipid profile, Cu <sup>2+</sup> -dependent formation of thiobarbituric acid reactive substances (TBARS)                                                                            | 20, 40 mg/kg                     | i.p. | non-significant decrease in triacylglycerides, no change in total, HDL, LDL, or IDL cholesterol, or TBARS in Cu <sup>2+</sup> -treated serum                                                                                                  | 56 |
| Rabbit               | atherosclerotic development on a hypercholesterolemic diet                                                                                                                         | 0.6, then 1 mg/kg                | oral | no change in body or liver weight, cholesterol, or LDL oxidation, increase in aortic atherosclerotic lesions                                                                                                                                  | 57 |
| Rat                  | serum lipid levels after feeding an oil mixture                                                                                                                                    | 50, 100                          | oral | reduced total cholesterol and triglycerides in liver, no change in                                                                                                                                                                            | 58 |

|                             |                                                                                                                    |                                               |              |                                                                                                                                                                                                                                                                                                                                       |    |
|-----------------------------|--------------------------------------------------------------------------------------------------------------------|-----------------------------------------------|--------------|---------------------------------------------------------------------------------------------------------------------------------------------------------------------------------------------------------------------------------------------------------------------------------------------------------------------------------------|----|
|                             |                                                                                                                    | mg/kg                                         |              | serum cholesterol, triglycerides, free fatty acids                                                                                                                                                                                                                                                                                    |    |
| Mouse                       | triglyceride synthesis                                                                                             | 25, 50 mg/kg                                  | i.p. or oral | reduced lipogenesis in liver and adipose                                                                                                                                                                                                                                                                                              | 58 |
| <i>Ischemic Heart</i>       |                                                                                                                    |                                               |              |                                                                                                                                                                                                                                                                                                                                       |    |
| Rat                         | expression of NOS and potential NO targets in heart, ischemia/reperfusion of isolated hearts                       | 2.5 mg/kg                                     | gav.         | induction of iNOS and VEGF, followed by KDR and eNOS, improvement in ventricular functional recovery, decrease in infarct size and apoptosis                                                                                                                                                                                          | 59 |
| Rat                         | ischemia/reperfusion of isolated hearts                                                                            | 20, +/- 10 $\mu$ M                            | i.g., perf.  | improved post-ischemic recovery with chronic treatment regardless of acute treatment, partially protected with acute treatment only                                                                                                                                                                                                   | 60 |
| Rat                         | low-flow ischemia/reperfusion of isolated hearts                                                                   | 10 $\mu$ M                                    | perf.        | increased adenosine release and coronary flow, prevented by perfusion with an adenosine antagonist                                                                                                                                                                                                                                    | 61 |
| Rat                         | low-flow ischemia/reperfusion of isolated heart 24 hours after treatment                                           | ~1 mg/kg                                      | d.w.         | improved functional recovery, prevented by perfusion with an adenosine antagonist or NOS inhibitor, no effect on ATP or phosphocreatine levels                                                                                                                                                                                        | 61 |
| Mouse                       | ischemia/reperfusion of isolated wild type or iNOS null hearts                                                     | 10 $\mu$ M                                    | perf.        | iNOS-dependent improvement in ventricular functional recovery, decrease in infarct size, apoptosis, and malondialdehyde                                                                                                                                                                                                               | 62 |
| Rat                         | ischemia/reperfusion of isolated hearts                                                                            | 10 $\mu$ M                                    | perf.        | improved developed pressure and aortic flow, decreased infarct size, apoptosis and malondialdehyde, all effects iNOS-dependent                                                                                                                                                                                                        | 63 |
| Rat                         | ischemia/reperfusion of isolated hearts                                                                            | 10 $\mu$ M                                    | perf.        | non-significant increase in coronary flow, decrease in infarct size and superoxide                                                                                                                                                                                                                                                    | 64 |
| Rat                         | myocardial ischemia by temporary occlusion of the left main coronary artery                                        | 0.23, 2.3, 23 $\mu$ g/kg                      | perf.        | no effect on arrhythmias or mortality, reduced incidence and duration of ventricular tachycardia and ventricular fibrillation, increased NO and decreased lactate dehydrogenase in carotid blood                                                                                                                                      | 65 |
| Rat                         | ischemia/reperfusion of isolated heart                                                                             | 10 $\mu$ M                                    | perf.        | improved post-ischemic recovery (rate pressure product), decreased phosphorylation potential                                                                                                                                                                                                                                          | 66 |
| Rat                         | ischemia/reperfusion of isolated heart                                                                             | 10 $\mu$ M                                    | perf.        | increased developed pressure and aortic flow, decreased infarct size and malondialdehyde                                                                                                                                                                                                                                              | 67 |
| Rat                         | ischemia/reperfusion of isolated heart                                                                             | 10 $\mu$ M                                    | perf.        | increased developed pressure and aortic flow, decreased infarct size and malondialdehyde                                                                                                                                                                                                                                              | 68 |
| <i>Endocrine Effects</i>    |                                                                                                                    |                                               |              |                                                                                                                                                                                                                                                                                                                                       |    |
| Rat                         | streptozotocin (+/- nicotinamide)-induced diabetes                                                                 | 0.1, 0.25, 0.5, 0.75, 0.5 mg/kg (3 times/day) | oral         | reduced plasma glucose and triglycerides, weight loss, polyphagia, and polydipsia, enhanced glucose uptake in skeletal muscle, hepatocytes, and adipocytes, and glycogen synthesis in liver, decreased insulin secretion and delayed the onset of insulin resistance in nicotinamide-treated animals                                  | 69 |
| Trout                       | handling-induced, aryl hydrocarbon receptor-dependent stress response (+/- suppression by $\beta$ -naphthoflavone) | 20 mg/kg                                      | diet         | blocked the ability of $\beta$ -naphthoflavone to stimulate liver and kidney CYP1A expression, to suppress handling-induced increases in plasma cortisol and glucose, and to decrease expression of interrenal, steroidogenic acute regulatory protein, CYP450 cholesterol side chain cleavage, and 11 $\beta$ -hydroxylase in kidney | 70 |
| Rat                         | steroidogenesis in explanted adrenocortical cells                                                                  | 840 mg/kg                                     | diet         | increased adrenal weight, decreased CYP450 c21 expression and corticosterone production                                                                                                                                                                                                                                               | 71 |
| <i>Neurological Effects</i> |                                                                                                                    |                                               |              |                                                                                                                                                                                                                                                                                                                                       |    |
| Mouse                       | middle cerebral artery occlusion                                                                                   | 50 mg/kg                                      | gav.         | decreased infarct volume and attenuated the increase in MMP-9 mRNA and protein expression in brain tissue                                                                                                                                                                                                                             | 72 |
| Rabbit                      | ischemia/reperfusion-induced spinal injury                                                                         | 0.1 mg/kg                                     | i.v.         | improved neurologic function (Tarlov score) and survival of motor neurons, decreased myeloperoxidase activity and malondialdehyde in spinal tissue                                                                                                                                                                                    | 73 |
| Rat                         | brain biochemistry following ovariectomy                                                                           | 5 mg/kg                                       | gav.         | prevented the decrease in <i>N</i> -acetyl aspartate and increase in choline                                                                                                                                                                                                                                                          | 74 |
| Rat                         | kainic acid-induced neurotoxicity                                                                                  | 30 mg/kg                                      | i.p.         | reduced damage to hippocampal neurons, activation of astrocytes and microglial cells                                                                                                                                                                                                                                                  | 75 |
| Mouse                       | permanent middle cerebral artery occlusion                                                                         | 2, 20 mg/kg                                   | oral         | 3 day treatment with 20 mg/kg reduced infarct volume 36% in wild type but not PPAR $\alpha$ -/- mice                                                                                                                                                                                                                                  | 76 |
| Rat                         | auditory brainstem responses pre- and post 105 dB noise                                                            | 0.43 mg/kg                                    | gav.         | protective effect on hearing loss, significant at 2 of 4 frequencies                                                                                                                                                                                                                                                                  | 77 |
| Rat                         | permanent middle cerebral artery occlusion                                                                         | 10, 100, 1000 ng/kg                           | i.v.         | ischemic volume and brain water content reduced in 100, 1000 ng/kg, no effect on p65 (NF $\kappa$ B)                                                                                                                                                                                                                                  | 78 |
| Rat                         | experimentally induced spinal cord injury                                                                          | 50, 100 mg/kg                                 | i.p.         | decreased spinal edema, lactate dehydrogenase, and malondialdehyde, increased Na <sup>+</sup> , K <sup>+</sup> -ATPase activity                                                                                                                                                                                                       | 79 |
| Rat                         | experimentally-induced spinal cord injury                                                                          | 100, 500 mg/kg                                | i.p.         | increased Ca <sup>2+</sup> -ATPase, Mg <sup>2+</sup> -ATPase, and Ca <sup>2+</sup> , Mg <sup>2+</sup> -ATPase activity                                                                                                                                                                                                                | 80 |
| Rat                         | intracerebroventricular streptozotocin-induced cognitive impairment and oxidative stress                           | 10, 20 mg/kg                                  | i.p.         | prevented decreases in malondialdehyde and glutathione levels in brain, partially restored behavior/cognition                                                                                                                                                                                                                         | 81 |
| Rat                         | lipopolysaccharide-induced anorexia (COX-2 dependent)                                                              | 2.5, 10, 40 mg/kg                             | i.p.         | no significant effect on food intake in controls, enhanced anorexia, no effect on PGE <sub>2</sub> levels in cerebrospinal fluid                                                                                                                                                                                                      | 82 |
| Rat                         | focal ischemia induced by middle cerebral artery                                                                   | 20 mg/kg                                      | i.p.         | prevented motor impairment, rise in reduced glutathione and                                                                                                                                                                                                                                                                           | 83 |

|                                 |                                                                                                                          |                        |           |                                                                                                                                                                                                                                                                             |        |
|---------------------------------|--------------------------------------------------------------------------------------------------------------------------|------------------------|-----------|-----------------------------------------------------------------------------------------------------------------------------------------------------------------------------------------------------------------------------------------------------------------------------|--------|
|                                 | occlusion                                                                                                                |                        |           | malondialdehyde, decreased infarct volume                                                                                                                                                                                                                                   |        |
| Gerbil                          | transient global cerebral ischemia induced by occlusion of both common carotid arteries for 5 min                        | 30 mg/kg               | i.p.      | decreased delayed neuronal cell death and glial cell activation in hippocampal CA1 area                                                                                                                                                                                     | 84     |
| Rat                             | pentylentetrazole-induced seizures                                                                                       | 20, 40, 80 mg/kg       | i.p.      | reduced seizures, potentiated the anticonvulsive effects of sodium valproate, diazepam, and adenosine                                                                                                                                                                       | 85     |
| Rat                             | kainic acid-induced seizures                                                                                             | 20, 40 mg/kg           | i.p.      | single dose ineffective, reduced incidence of seizures and lowered malondialdehyde levels in brain when additional 30 and 90-minute doses were given, no effect on glutathione levels                                                                                       | 86     |
| Rat                             | intracortical FeCl <sub>3</sub> -induced posttraumatic seizures                                                          | 20, 40 mg/kg           | i.p.      | delayed the onset and reduced the severity of epileptic EEG discharge, blocked rise in malondialdehyde                                                                                                                                                                      | 87     |
| Rat                             | focal cerebral ischemia induced by middle cerebral artery occlusion                                                      | 1, 10, 100, 1000 ng/kg | i.v.      | significant reduction in infarct volume at 100, 1000 ng/kg, no effect on heart rate or blood pressure                                                                                                                                                                       | 88     |
| Rat                             | damage to olfactory cortex and hippocampus caused by systemic injection of kainic acid                                   | 8 mg/kg                | d.w.      | partially blocked the decrease in glutamate decarboxylase in olfactory cortex and hippocampus                                                                                                                                                                               | 89     |
| <i>Longevity</i>                |                                                                                                                          |                        |           |                                                                                                                                                                                                                                                                             |        |
| <i>N. furzeri</i> (fish)        | longevity and degenerative phenotypes in a short-lived vertebrate                                                        | ~1, 2, 6, 30 mg/kg     | diet      | dose dependent increase in mean survival at 6 and 30 mg/kg, slowed neurofibrillary degeneration, and the decline in locomotor activity and active avoidance behavior                                                                                                        | 90     |
| <i>Other Protective Effects</i> |                                                                                                                          |                        |           |                                                                                                                                                                                                                                                                             |        |
| Rat                             | sodium taurocholate-induced pancreatitis                                                                                 | 20 mg/kg               | i.v.      | decreased lipid peroxidation in cell membranes, serum amylase, pancreatic lesions, and malondialdehyde                                                                                                                                                                      | 91     |
| Rat                             | sodium taurocholate-induced pancreatitis                                                                                 | 10 mg/kg               | i.v.      | decreased expression of NF- $\kappa$ B and iNOS in peritoneal macrophages, levels of TNF- $\alpha$ , IL-1, and NO in serum and media following culture of macrophages, and pancreatic damage                                                                                | 92     |
| Rat                             | renal ischemia/reperfusion injury                                                                                        | 5 mg/kg                | per os    | improved renal function and morphology, reduced NO levels and oxidative stress                                                                                                                                                                                              | 93     |
| Rat                             | streptozotocin-induced diabetic nephropathy                                                                              | 5, 10 mg/kg            | oral      | improved creatinine and urea clearance, decreased proteinuria, and lipid peroxidation, and restored antioxidant enzymes                                                                                                                                                     | 94     |
| Rat                             | 5/6th nephrectomy                                                                                                        | 5 mg/kg                | per os    | blocked the increase in systolic blood pressure, urinary protein excretion, glomerulosclerosis, blood urea nitrogen, and plasma creatinine, restored urinary secretion of NO <sub>2</sub> + NO <sub>3</sub> , all effects attenuated by coadministration of a NOS inhibitor | 95     |
| Rat                             | renal ischemia                                                                                                           | 5 mg/kg                | oral      | decreased kidney damage, plasma creatinine, blood urea nitrogen, and TBARS, increased renal and urine NO, creatinine clearance, reduced glutathione, catalase, and SOD, similar to the effects of ischemic preconditioning, all effects abolished by NO synthase inhibitor  | 96     |
| Rat                             | apoptosis in germ cells following testicular torsion                                                                     | 30 mg/kg               | i.p.      | decreased TUNEL staining and caspase 3 activation                                                                                                                                                                                                                           | 97     |
| Rat                             | half mustard gas-induced acute lung injury                                                                               | 100 $\mu$ L            | liposomes | 48% decrease in lung injury (leakage of <sup>125</sup> I-albumin from blood)                                                                                                                                                                                                | 98     |
| Rat                             | liver injury induced by chronic biliary obstruction                                                                      | 10 mg/kg               | i.p.      | decreased ductular proliferation and lymphocytic infiltration, plasma bilirubin, alanine and aspartate aminotransferases, liver malondialdehyde, NO, IL-1 $\alpha$ , IL-6, and TNF- $\alpha$ , increased liver reduced glutathione                                          | 99,100 |
| Rat                             | tert-butyl hydroperoxide-induced pancreatitis                                                                            | ~6.6 mg/kg             | i.p.      | decreased serum amylase and pancreatic mass, decreased edema, vacuolization, bleeding, necrosis, carbonyl groups, and damage to ER and mitochondria, and increased reduced glutathione in pancreatic tissue                                                                 | 101    |
| Rat                             | ischemia-reperfusion injury induced by testicular torsion                                                                | 30 mg/kg               | i.p.      | decreased testicular injury and malondialdehyde, increased glutathione                                                                                                                                                                                                      | 102    |
| Rat                             | cyclosporine-induced nephrotoxicity                                                                                      | 2, 5, 10 mg/kg         | oral      | NOS-dependent improvement in renal function, NO levels, oxidative stress, and renal morphology                                                                                                                                                                              | 103    |
| Rat                             | bone loss following ovariectomy                                                                                          | 0.7 mg/kg              | gav.      | partially restored femoral epiphysis bone mineral density and bone calcium content, no effect on femoral midpoint bone mineral density                                                                                                                                      | 104    |
| Rat                             | ischemia/reperfusion injury in kidney                                                                                    | 4 mg/kg                | i.p.      | prevented the increase in serum creatine levels and CD86 expression in kidney                                                                                                                                                                                               | 105    |
| Rat                             | sperm production                                                                                                         | 20 mg/kg               | gav.      | increased sperm counts, gonadotrophins and testosterone, no effect on testes weight or sperm quality, decreased diameter and increased density of seminiferous tubules                                                                                                      | 106    |
| Rat                             | toxicogenomics in liver                                                                                                  | 300, 1000, 3000 mg/kg  | gav.      | some liver and kidney toxicity at the highest dose, general decrease in the expression of phase I drug metabolizing enzymes and increase in the expression of phase II enzymes                                                                                              | 107    |
| Rat                             | microcirculatory disorders following severe acute pancreatitis                                                           | 0.1 mg/kg              | i.p.      | improved blood flow and decreased microcirculatory disorder in lung                                                                                                                                                                                                         | 108    |
| Rat                             | electron paramagnetic resonance of liver mitochondrial phospholipid bilayer structure after gavage with CCl <sub>4</sub> | ~ 75 mg/kg             | gav.      | prevented disordering of the bilayer by 50%                                                                                                                                                                                                                                 | 109    |
| Rat                             | intestinal transit (Evans blue migration) after skin incision, laparotomy, or laparotomy plus gut                        | 10 mg/kg               | s.c.      | in combination with tin protoporphyrin-IX, reversed the inhibitory effects of laparotomy and gut handling on intestinal transit                                                                                                                                             | 110    |

|                                                 |                                                                                                                      |                        |        |                                                                                                                                                                                                                                                                                               |     |
|-------------------------------------------------|----------------------------------------------------------------------------------------------------------------------|------------------------|--------|-----------------------------------------------------------------------------------------------------------------------------------------------------------------------------------------------------------------------------------------------------------------------------------------------|-----|
|                                                 | evisceration and handling                                                                                            |                        |        |                                                                                                                                                                                                                                                                                               |     |
| Rat                                             | TNBS (10 mg/animal)-induced colitis                                                                                  | 5, 10 mg/kg            | gav.   | reduced colonic injury, neutrophil count, IL-1 $\beta$ , PGD <sub>2</sub> , and COX-2 expression, no effect on PGE <sub>2</sub> or COX-1 expression, enhanced apoptosis                                                                                                                       | 111 |
| Rat                                             | intestinal transit following laparotomy and gut manipulation                                                         | 1, 3, 10 mg/kg         | i.v.   | significant improvement in 3, 10 mg/kg, but not 1 mg/kg                                                                                                                                                                                                                                       | 112 |
| Rat                                             | gentamicin-induced nephrotoxicity                                                                                    | 120 mg/kg              | gav.   | improved glomerular filtration rate and renal blood flow, prevented increases in N-acetyl-beta-D-glucosaminidase and lipid peroxidation                                                                                                                                                       | 113 |
| Rat                                             | enzymatic activities in duodenum, jejunum, and ileum                                                                 | 20 mg/kg               | oral   | no significant change in maltase, sucrase, trehalase, lactase, or alkaline phosphatase                                                                                                                                                                                                        | 114 |
| Rat                                             | half-mustard-gas-induced acute lung injury                                                                           | 50 mg/kg               | i.p.   | 61% decrease in lung injury (extravasation)                                                                                                                                                                                                                                                   | 115 |
| Rat                                             | computer morphometric analysis of kidney morphology following ischemia/reperfusion injury                            | 1 nmol                 | inf.   | decreased mortality from 50% to 10%, prevented decrease in glomerular volume, improved shape, decreased endocapillary clots and serum creatine                                                                                                                                                | 116 |
| Rat                                             | b.w., food and water consumption, histopathology                                                                     | 20 mg/kg               | oral   | no effect on b.w., food or water consumption, hematological or clinical biochemistry variables, or histopathology                                                                                                                                                                             | 117 |
| Rat                                             | i.v. injection of anti-rat kidney glomerular basement membrane rabbit antiserum                                      | 0.5 mg/kg              | oral   | reduced enlargement of kidney and liver, reduced weight loss, reduced urinary protein secretion, increased serum albumin, reduced hyperlipidemia                                                                                                                                              | 118 |
| Rat                                             | ischemia/reperfusion injury in kidney                                                                                | 0.23 $\mu$ g/kg        | inf.   | reduced mortality from 50% to 10%, partially blocked increase in creatine and decrease in NO, blocked rise in thiobarbituric acid-reactive substances                                                                                                                                         | 119 |
| Rat                                             | potassium bromate-induced oxidative damage to kidney DNA                                                             | 16 mg/kg               | i.p.   | blocked increase of 8-oxo-7,8-dihydro-2'-deoxyguanosine and increase in kidney weight                                                                                                                                                                                                         | 120 |
| Mouse                                           | 12-O-tetradecanoylphorbol-13-acetate-induced oxidative events and gene expression in skin                            | 1, 5, 10, 25 $\mu$ mol | top.   | restored H <sub>2</sub> O <sub>2</sub> , glutathione, myeloperoxidase, oxidized glutathione reductase, and super oxide dismutase to control levels, prevented upregulation of <i>c-fos</i> and <i>TGF-<math>\beta</math>1</i>                                                                 | 121 |
| <i>Prevention of Mild (Protective) Stresses</i> |                                                                                                                      |                        |        |                                                                                                                                                                                                                                                                                               |     |
| Rat                                             | protection of pancreas from cerulein-induced injury by ischemic preconditioning                                      | 10 mg/kg               | i.g.   | blocked the protective effect of preconditioning, to a lesser extent than rofecoxib                                                                                                                                                                                                           | 122 |
| Rat                                             | protection of gastric mucosa from ischemic injury by preconditioning with brief exposures to ischemia                | 10 mg/kg               | i.g.   | blocked the protective effect of preconditioning, unless PGE <sub>2</sub> was also given                                                                                                                                                                                                      | 123 |
| Rat                                             | protection of gastric mucosa from ischemic injury by preconditioning with brief exposures to ischemia                | 10 mg/kg               | i.g.   | blocked the protective effect of preconditioning, unless PGE <sub>2</sub> was also administered                                                                                                                                                                                               | 124 |
| Rat                                             | protection from caerulein-induced pancreatitis by pre-treatment with low dose LPS                                    | 2, 10 mg/kg            | i.p.   | prevented LPS-induced decrease in edema, leukocyte infiltration, and pancreatic weight, prevented increase in pancreatic blood flow                                                                                                                                                           | 125 |
| Rat                                             | protection from gastric mucosal damage due to water immersion and restraint stress (WRS) by pre-exposure to mild WRS | 10 mg/kg               | i.g.   | no effect on WRS, but decreased the protective effect of pre-exposure on gastric lesions and blood flow unless PGE <sub>2</sub> was also administered                                                                                                                                         | 126 |
| <i>Immunological/Inflammatory Effects</i>       |                                                                                                                      |                        |        |                                                                                                                                                                                                                                                                                               |     |
| Mouse                                           | xylene-induced ear edema                                                                                             | 200 mg/kg              | oral   | reduced ear weight by 38.9% (similar to ibuprofen)                                                                                                                                                                                                                                            | 127 |
| Mouse                                           | vaginal HSV-1 and HSV-2 infection                                                                                    | 6.25, 12.5, 19% cream  | top.   | decreased viral titers and extravaginal lesions, HSV-2 mortality was reduced from 37% (control) to 40%, 24%, and 3% respectively                                                                                                                                                              | 128 |
| Rat                                             | allograft rejection following orthotopic liver transplantation                                                       | 25, 50, 100 mg/kg      | i.p.   | increased NF $\kappa$ B activity in peripheral blood lymphocytes (all groups), increased survival and serum albumin, decreased serum bile acid, alanine aminotransferase, IL-2, and interferon $\gamma$ (significant only at 100 mg/kg)                                                       | 129 |
| Rat                                             | allograft rejection following orthotopic liver transplantation                                                       | 100 mg/kg              | i.p.   | in combination with cyclosporine, increased survival and serum albumin, decreased serum bile acid, alanine aminotransferase, IL-2, and interferon $\gamma$ , NF $\kappa$ B activation in peripheral blood T lymphocytes, and histological damage as compared to cyclosporine alone or control | 130 |
| Rabbit                                          | osteoarthritis induced by ligament transection                                                                       | ~ 2.3 mg/kg            | inj.   | reduced loss of cartilage tissue and matrix proteoglycan, non-significant decrease in synovial inflammation                                                                                                                                                                                   | 131 |
| Rat                                             | lipopolysaccharide-induced airway inflammation                                                                       | 1, 3, 10, 30 mg/kg     | trach. | reduced neutrophilia, pro-inflammatory cytokines, PGE <sub>2</sub> levels (30 mg/kg)                                                                                                                                                                                                          | 132 |
| Rat                                             | inflammatory effects following severe acute pancreatitis                                                             | 30 mg/kg               | i.p.   | decreased expression of NF $\kappa$ B and inflammatory markers                                                                                                                                                                                                                                | 133 |
| Mouse                                           | skin lesions formed in response to HSV-1 infection                                                                   | 12.5, 25% cream        | top.   | decreased skin lesions in wild type or acyclovir-resistant HSV-1                                                                                                                                                                                                                              | 134 |
| Mouse                                           | b.w., cell counts in blood, marrow, and spleen, cytokine levels, T cell proliferation                                | ~ 10-12 mg/kg          | oral   | no significant change in weight, cell counts, or IL-12, reduced TNF- $\alpha$ and marginally reduced allo-antigen induced T cell proliferation                                                                                                                                                | 135 |
| Mouse                                           | DNFB-induced delayed type hypersensitivity (DTH) response                                                            | 4, 16 mg/kg            | oral   | increased DTH, MHC class I and II expression on spleenocytes, antagonized EtOH-induced decrease in macrophage number                                                                                                                                                                          | 136 |
| Rat                                             | conavalin A-induced rise in the cytosolic Ca <sup>2+</sup> content of splenic T cells during sepsis                  | 10 mg/kg               | i.p.   | no effect on Ca <sup>2+</sup> response in controls, non-significant further decrease in septic animals                                                                                                                                                                                        | 137 |
| Rat                                             | carrageenan-induced inflammation                                                                                     | 3, 8 mg/kg             | oral   | decreased acute and chronic edema (paw volume)                                                                                                                                                                                                                                                | 40  |
| <i>Angiogenesis/Wound Healing</i>               |                                                                                                                      |                        |        |                                                                                                                                                                                                                                                                                               |     |

|                                         |                                                                                                                        |                             |              |                                                                                                                                                                                              |     |
|-----------------------------------------|------------------------------------------------------------------------------------------------------------------------|-----------------------------|--------------|----------------------------------------------------------------------------------------------------------------------------------------------------------------------------------------------|-----|
| Mouse                                   | corneal micropocket assay for vascularization                                                                          | ~ 48 µg/kg                  | d.w.         | decreased corneal vascularization (number of microvessels)                                                                                                                                   | 34  |
| Mouse                                   | wound healing in skin                                                                                                  | 5.7 µg/mL                   | d.w.         | prolonged wound healing (increased wound size and percentage of open wounds)                                                                                                                 | 34  |
| Rat                                     | gastric ulcers produced by serosal application of acetic acid                                                          | 10 mg/kg                    | i.g.         | prolonged ulcer healing, decreased PGE <sub>2</sub> production, increased plasma TNF $\alpha$ and IL-1 $\beta$                                                                               | 138 |
| Rat                                     | gastric lesions resulting from ischemia/reperfusion by clamping the celiac artery                                      | 10 mg/kg                    | i.g.         | augmented gastric lesions and delayed healing, decreased PGE <sub>2</sub> generation                                                                                                         | 139 |
| <i>Analgesic Effects</i>                |                                                                                                                        |                             |              |                                                                                                                                                                                              |     |
| Rat                                     | antinociception by the formalin test (flinching behavior after local injection of formalin)                            | 25, 50, 100, 200 µg         | inj.         | decrease in flinching behavior that was blocked by inhibitors of Ca <sup>2+</sup> and voltage-dependent K <sup>+</sup> channels, but not inhibitors of ATP-sensitive K <sup>+</sup> channels | 140 |
| Rat                                     | antinociception by the formalin test (flinching behavior following injection of 1 or 5% formalin into paw)             | 50, 100, 200 µg             | inj.         | reduction in phase II (15-60 min) flinching, no effect when injected into the contralateral paw                                                                                              | 141 |
| Rat                                     | hyperalgesia, edema, and swelling induced by injection of carrageenan into the paw                                     | 0.4, 2, 10, 50 mg/kg        | i.p.         | analgesic effects at 2, 10 mg/kg by vocalization threshold (50 mg/kg caused agitation), no effect on paw circumference                                                                       | 142 |
| <i>Estrogenic/Developmental Effects</i> |                                                                                                                        |                             |              |                                                                                                                                                                                              |     |
| Rat                                     | vaginal epithelial maturation following ovariectomy                                                                    | 5 mg/kg                     | per os       | restored the proportions parabasal and superficial, but not intermediate and anuclear cells in vaginal smears                                                                                | 143 |
| Mouse                                   | development of the reproductive tract and mammary glands after prepubertal exposure                                    | 10 mg/kg                    | s.c.         | no effect on vaginal opening, estrous cyclicity, vaginal morphology, or mammary gland growth                                                                                                 | 144 |
| Mouse                                   | estrous cycling and onset of puberty after treatment from gestational day 15                                           | 0.5, 10 mg/kg (4 times/day) | s.c.         | increased body weight, no effect on vaginal opening, elongated estrous cycle, transient effects on reproductive tract and mammary gland development at 10 mg/kg                              | 145 |
| Mouse                                   | b.w., organ weight, reproductive fitness over two generations                                                          | 3 mg/L                      | d.w.         | no effect on b.w., decreased liver and spleen weight in P, kidney weight in F1, no effect on acrosomal integrity, sperm quality, or litters                                                  | 146 |
| Rat                                     | sexual differentiation, open field behavior, brain development during fetal and suckling periods                       | 5 mg/L                      | d.w.         | abolished sex difference in locus coeruleus size, inhibited female sexual behavior, delayed vaginal opening, no effect on open field behavior                                                | 147 |
| Mouse                                   | female sexual development                                                                                              | 2 mg/kg                     | oral or s.c. | shortened latency to vaginal opening                                                                                                                                                         | 148 |
| Rat                                     | b.w. and estrous cycling, estrogen sensitivity and sociosexual behavior following ovariectomy                          | 100 µM, or 10, 100, 1000 µg | d.w. or s.c. | decreased b.w., ovarian hypertrophy, disrupted estrous cycling, failure to mimic the action of 17 $\beta$ -estradiol benzoate in ovariectomized animals                                      | 149 |
| Rat                                     | uterine weight, histopathological changes, ER $\alpha$ and progesterone receptor (PR) expression, peroxidase induction | 18, 58, 575 mg/kg           | s.c.         | mild decrease in uterine weight, no change in histology, decrease in ER $\alpha$ protein levels, no change in PR protein or mRNA, no peroxidase induction                                    | 150 |
| Rat                                     | ovariectomy-induced hypertension and bone loss                                                                         | 5 mg/kg                     | diet         | no significant effect on body weight, lowered systolic blood pressure, improved acetylcholine-induced vascular relaxation and bone strength                                                  | 151 |
| Rat                                     | comparison to estradiol (100 µg) for effects on growth, development, and gene expression                               | 1, 4, 10, 40, 100, 1000 µg  | gav.         | no significant effect on body weight, serum cholesterol, radial bone growth, epithelial cell height, or IGF-1 expression, antagonized the cholesterol-lowering effect of estradiol           | 152 |

i.p. – intraperitoneal, top. – topical, d.w. – drinking water, inj. – injection, adb. – abdominal injection, gav. – gavage, s.c. – subcutaneous injection, i.g. – intragastric, i.v. – intravenous injection, perf. – perfusion.

1. Kuroiwa, Y. *et al.* Protective effects of benzyl isothiocyanate and sulforaphane but not resveratrol against initiation of pancreatic carcinogenesis in hamsters. *Cancer Lett* (2005).
2. Garvin, S., Ollinger, K. & Dabrosin, C. Resveratrol induces apoptosis and inhibits angiogenesis in human breast cancer xenografts *in vivo*. *Cancer Lett* **231**, 113–22 (2006).
3. Sengottuvelan, M., Viswanathan, P. & Nalini, N. Chemopreventive effect of trans-resveratrol- a phytoalexin against colonic aberrant crypt foci and cell proliferation in 1, 2-dimethylhydrazine induced colon carcinogenesis. *Carcinogenesis* (2005).
4. Aziz, M. H., Reagan-Shaw, S., Wu, J., Longley, B. J. & Ahmad, N. Chemoprevention of skin cancer by grape constituent resveratrol: relevance to human disease? *Faseb J* (2005).
5. Wenzel, E., Soldo, T., Erbersdobler, H. & Somoza, V. Bioactivity and metabolism of trans-resveratrol orally administered to Wistar rats. *Mol Nutr Food Res* **49**, 482–94 (2005).
6. Provinciali, M. *et al.* Effect of resveratrol on the development of spontaneous mammary tumors in HER-2/neu transgenic mice. *Int J Cancer* **115**, 36–45 (2005).
7. Sale, S. *et al.* Comparison of the effects of the chemopreventive agent resveratrol and its synthetic analog trans 3, 4, 5, 4'-tetramethoxystilbene (DMU-212) on adenoma development in the Apc(Min<sup>+</sup>) mouse and cyclooxygenase-2 in human-derived colon cancer cells. *Int J Cancer* **115**, 194–201 (2005).

8. Zhou, H. B., Chen, J. J., Wang, W. X., Cai, J. T. & Du, Q. Anticancer activity of resveratrol on implanted human primary gastric carcinoma cells in nude mice. *World J Gastroenterol* **11**, 280–4 (2005).
  9. Reagan-Shaw, S., Afaq, F., Aziz, M. H. & Ahmad, N. Modulations of critical cell cycle regulatory events during chemoprevention of ultraviolet B-mediated responses by resveratrol in SKH-1 hairless mouse skin. *Oncogene* **23**, 5151–60 (2004).
  10. Berge, G., Ovrebo, S., Eilertsen, E., Haugen, A. & Mollerup, S. Analysis of resveratrol as a lung cancer chemopreventive agent in A/J mice exposed to benzo[a]pyrene. *Br J Cancer* **91**, 1380–3 (2004).
  11. Wu, S. L. *et al.* Effect of resveratrol and in combination with 5-FU on murine liver cancer. *World J Gastroenterol* **10**, 3048–52 (2004).
  12. Fu, Z. D., Cao, Y., Wang, K. F., Xu, S. F. & Han, R. [Chemopreventive effect of resveratrol to cancer]. *Ai Zheng* **23**, 869–73 (2004).
  13. Chen, Y., Tseng, S. H., Lai, H. S. & Chen, W. J. Resveratrol-induced cellular apoptosis and cell cycle arrest in neuroblastoma cells and antitumor effects on neuroblastoma in mice. *Surgery* **136**, 57–66 (2004).
  14. Aziz, M., Afaq, F. & Ahmad, N. Prevention of ultraviolet B radiation- damage by resveratrol in mouse skin is mediated via modulation in Survivin. *Photochem Photobiol* (2004).
  15. Khanduja, K. L., Bhardwaj, A. & Kaushik, G. Resveratrol inhibits N-nitrosodiethylamine-induced ornithine decarboxylase and cyclooxygenase in mice. *J Nutr Sci Vitaminol (Tokyo)* **50**, 61–5 (2004).
  16. Ziegler, C. C., Rainwater, L., Whelan, J. & McEntee, M. F. Dietary resveratrol does not affect intestinal tumorigenesis in Apc(Min/+) mice. *J Nutr* **134**, 5–10 (2004).
  17. Tseng, S. H. *et al.* Resveratrol suppresses the angiogenesis and tumor growth of gliomas in rats. *Clin Cancer Res* **10**, 2190–202 (2004).
  18. Afaq, F., Adhami, V. M. & Ahmad, N. Prevention of short-term ultraviolet B radiation-mediated damages by resveratrol in SKH-1 hairless mice. *Toxicol Appl Pharmacol* **186**, 28–37 (2003).
  19. Sato, M. *et al.* Prepubertal resveratrol exposure accelerates N-methyl-N-nitrosourea-induced mammary carcinoma in female Sprague-Dawley rats. *Cancer Lett* **202**, 137–45 (2003).
  20. Miura, D., Miura, Y. & Yagasaki, K. Hypolipidemic action of dietary resveratrol, a phytoalexin in grapes and red wine, in hepatoma-bearing rats. *Life Sci* **73**, 1393–400 (2003).
  21. Yu, L., Sun, Z. J., Wu, S. L. & Pan, C. E. Effect of resveratrol on cell cycle proteins in murine transplantable liver cancer. *World J Gastroenterol* **9**, 2341–3 (2003).
  22. Breinholt, V. M. *et al.* Effects of dietary antioxidants and 2-amino-3-methylimidazo[4, 5-f]-quinoline (IQ) on preneoplastic lesions and on oxidative damage, hormonal status, and detoxification capacity in the rat. *Food Chem Toxicol* **41**, 1315–23 (2003).
  23. Revel, A. *et al.* Resveratrol, a natural aryl hydrocarbon receptor antagonist, protects lung from DNA damage and apoptosis caused by benzo[a]pyrene. *J Appl Toxicol* **23**, 255–61 (2003).
- Describes the *in vivo* confirmation of effects predicted based on the ability of resveratrol to inhibit the aryl hydrocarbon receptor.**
24. Liu, H. S., Pan, C. E., Yang, W. & Liu, X. M. Antitumor and immunomodulatory activity of resveratrol on experimentally implanted tumor of H22 in Balb/c mice. *World J Gastroenterol* **9**, 1474–6 (2003).
  25. Soleas, G. J., Grass, L., Josephy, P. D., Goldberg, D. M. & Diamandis, E. P. A comparison of the anticarcinogenic properties of four red wine polyphenols. *Clin Biochem* **35**, 119–24 (2002).
  26. Banerjee, S., Bueso-Ramos, C. & Aggarwal, B. B. Suppression of 7, 12-dimethylbenz(a)anthracene-induced mammary carcinogenesis in rats by resveratrol: role of nuclear factor-kappaB, cyclooxygenase 2, and matrix metalloproteinase 9. *Cancer Res* **62**, 4945–54 (2002).
  27. Li, Z. G. *et al.* Suppression of N-nitrosomethylbenzylamine (NMBM)-induced esophageal tumorigenesis in F344 rats by resveratrol. *Carcinogenesis* **23**, 1531–6 (2002).
  28. Asensi, M. *et al.* Inhibition of cancer growth by resveratrol is related to its low bioavailability. *Free Radic Biol Med* **33**, 387–98 (2002).
  29. Gao, X. *et al.* Disparate *in vitro* and *in vivo* antileukemic effects of resveratrol, a natural polyphenolic compound found in grapes. *J Nutr* **132**, 2076–81 (2002).
  30. Bove, K., Lincoln, D. W. & Tsan, M. F. Effect of resveratrol on growth of 4T1 breast cancer cells *in vitro* and *in vivo*. *Biochem Biophys Res Commun* **291**, 1001–5 (2002).
  31. Revel, A. *et al.* Resveratrol, a natural aryl hydrocarbon receptor antagonist, protects sperm from DNA damage and apoptosis caused by benzo(a)pyrene. *Reprod Toxicol* **15**, 479–86 (2001).
  32. Bhat, K. P. *et al.* Estrogenic and antiestrogenic properties of resveratrol in mammary tumor models. *Cancer Res* **61**, 7456–63 (2001).
  33. Schneider, Y. *et al.* Resveratrol inhibits intestinal tumorigenesis and modulates host-defense-related gene expression in an animal model of human familial adenomatous polyposis. *Nutr Cancer* **39**, 102–7 (2001).
  34. Brakenhielm, E., Cao, R. & Cao, Y. Suppression of angiogenesis, tumor growth, and wound healing by resveratrol, a natural compound in red wine and grapes. *Faseb J* **15**, 1798–800 (2001).
  35. Kimura, Y. & Okuda, H. Resveratrol isolated from Polygonum cuspidatum root prevents tumor growth and metastasis to lung and tumor-induced neovascularization in Lewis lung carcinoma-bearing mice. *J Nutr* **131**, 1844–9 (2001).
  36. Caltagirone, S. *et al.* Flavonoids apigenin and quercetin inhibit melanoma growth and metastatic potential. *Int J Cancer* **87**, 595–600 (2000).

37. Tessitore, L., Davit, A., Sarotto, I. & Caderni, G. Resveratrol depresses the growth of colorectal aberrant crypt foci by affecting bax and p21(CIP) expression. *Carcinogenesis* **21**, 1619–22 (2000).
  38. Hecht, S. S. *et al.* Evaluation of butylated hydroxyanisole, myo-inositol, curcumin, esculetin, resveratrol and lycopene as inhibitors of benzo[a]pyrene plus 4-(methylnitrosamino)-1-(3-pyridyl)-1-butanone-induced lung tumorigenesis in A/J mice. *Cancer Lett* **137**, 123–30 (1999).
  39. Carbo, N., Costelli, P., Baccino, F. M., Lopez-Soriano, F. J. & Argiles, J. M. Resveratrol, a natural product present in wine, decreases tumour growth in a rat tumour model. *Biochem Biophys Res Commun* **254**, 739–43 (1999).
  40. Jang, M. *et al.* Cancer chemopreventive activity of resveratrol, a natural product derived from grapes. *Science* **275**, 218–20 (1997).
- Demonstrates that resveratrol is a naturally occurring inhibitor of cyclooxygenase, and possesses anti-inflammatory as well as anti-carcinogenic properties in vivo.**
41. Liu, Z. *et al.* Effects of trans-resveratrol on hypertension-induced cardiac hypertrophy using the partially nephrectomized rat model. *Clin Exp Pharmacol Physiol* **32**, 1049–54 (2005).
  42. Zhang, Y. *et al.* Resveratrol, a natural ingredient of grape skin: Antiarrhythmic efficacy and ionic mechanisms. *Biochem Biophys Res Commun* **340**, 1192–9 (2006).
  43. Wang, Z. *et al.* Dealcoholized red wine containing known amounts of resveratrol suppresses atherosclerosis in hypercholesterolemic rabbits without affecting plasma lipid levels. *Int J Mol Med* **16**, 533–40 (2005).
  44. Kaga, S., Zhan, L., Matsumoto, M. & Maulik, N. Resveratrol enhances neovascularization in the infarcted rat myocardium through the induction of thioredoxin-1, heme oxygenase-1 and vascular endothelial growth factor. *J Mol Cell Cardiol* **39**, 813–22 (2005).
  45. Miatello, R. *et al.* Chronic administration of resveratrol prevents biochemical cardiovascular changes in fructose-fed rats. *Am J Hypertens* **18**, 864–70 (2005).
  46. Auger, C. *et al.* Dietary wine phenolics catechin, quercetin, and resveratrol efficiently protect hypercholesterolemic hamsters against aortic fatty streak accumulation. *J Agric Food Chem* **53**, 2015–21 (2005).
  47. Auger, C. *et al.* Dietary Wine Phenolics Catechin, Quercetin, and Resveratrol Efficiently Protect Hypercholesterolemic Hamsters against Aortic Fatty Streak Accumulation. *J Agric Food Chem* **53**, 2015–2021 (2005).
  48. Fukao, H. *et al.* Effect of trans-resveratrol on the thrombogenicity and atherogenicity in apolipoprotein E-deficient and low-density lipoprotein receptor-deficient mice. *Blood Coagul Fibrinolysis* **15**, 441–6 (2004).
  49. Floreani, M., Napoli, E., Quintieri, L. & Palatini, P. Oral administration of trans-resveratrol to guinea pigs increases cardiac DT-diaphorase and catalase activities, and protects isolated atria from menadione toxicity. *Life Sci* **72**, 2741–50 (2003).
  50. Zou, J. G., Wang, Z. R., Huang, Y. Z., Cao, K. J. & Wu, J. M. Effect of red wine and wine polyphenol resveratrol on endothelial function in hypercholesterolemic rabbits. *Int J Mol Med* **11**, 317–20 (2003).
  51. Shigematsu, S. *et al.* Resveratrol, a red wine constituent polyphenol, prevents superoxide-dependent inflammatory responses induced by ischemia/reperfusion, platelet-activating factor, or oxidants. *Free Radic Biol Med* **34**, 810–7 (2003).
  52. Wang, Z. *et al.* Effect of resveratrol on platelet aggregation *in vivo* and *in vitro*. *Chin Med J (Engl)* **115**, 378–80 (2002).
  53. Wang, Z. *et al.* Effects of red wine and wine polyphenol resveratrol on platelet aggregation *in vivo* and *in vitro*. *Int J Mol Med* **9**, 77–9 (2002).
  54. Fulgenzi, A., Bertelli, A. A., Magni, E., Ferrero, E. & Ferrero, M. E. *In vivo* inhibition of TNFalpha-induced vascular permeability by resveratrol. *Transplant Proc* **33**, 2341–3 (2001).
  55. Mizutani, K., Ikeda, K., Kawai, Y. & Yamori, Y. Protective effect of resveratrol on oxidative damage in male and female stroke-prone spontaneously hypertensive rats. *Clin Exp Pharmacol Physiol* **28**, 55–9 (2001).
  56. Turrens, J. F., Lariccia, J. & Nair, M. G. Resveratrol has no effect on lipoprotein profile and does not prevent peroxidation of serum lipids in normal rats. *Free Radic Res* **27**, 557–62 (1997).
  57. Wilson, T., Knight, T. J., Beitz, D. C., Lewis, D. S. & Engen, R. L. Resveratrol promotes atherosclerosis in hypercholesterolemic rabbits. *Life Sci* **59**, PL15–21 (1996).
  58. Arichi, H. *et al.* Effects of stilbene components of the roots of *Polygonum cuspidatum* Sieb. et Zucc. on lipid metabolism. *Chem Pharm Bull (Tokyo)* **30**, 1766–70 (1982).
  59. Das, S. *et al.* Coordinated induction of iNOS-VEGF-KDR-eNOS after resveratrol consumption A potential mechanism for resveratrol preconditioning of the heart. *Vascul Pharmacol* **42**, 281–9 (2005).
- Explores the molecular basis of resveratrol's ability to protect hearts from ischemic injury, upstream and downstream of nitric oxide.**
60. Dernek, S. *et al.* Cardioprotection with resveratrol pretreatment: improved beneficial effects over standard treatment in rat hearts after global ischemia. *Scand Cardiovasc J* **38**, 245–54 (2004).
  61. Bradamante, S. *et al.* Resveratrol provides late-phase cardioprotection by means of a nitric oxide- and adenosine-mediated mechanism. *Eur J Pharmacol* **465**, 115–23 (2003).
  62. Imamura, G. *et al.* Pharmacological preconditioning with resveratrol: an insight with iNOS knockout mice. *Am J Physiol Heart Circ Physiol* **282**, H1996–2003 (2002).



63. Hattori, R., Otani, H., Maulik, N. & Das, D. K. Pharmacological preconditioning with resveratrol: role of nitric oxide. *Am J Physiol Heart Circ Physiol* **282**, H1988–95 (2002).
64. Hung, L. M. *et al.* The protective effect of resveratrols on ischaemia-reperfusion injuries of rat hearts is correlated with antioxidant efficacy. *Br J Pharmacol* **135**, 1627–33 (2002).
65. Hung, L. M., Chen, J. K., Huang, S. S., Lee, R. S. & Su, M. J. Cardioprotective effect of resveratrol, a natural antioxidant derived from grapes. *Cardiovasc Res* **47**, 549–55 (2000).
66. Bradamante, S. *et al.* Does resveratrol induce pharmacological preconditioning? *Int J Tissue React* **22**, 1–4 (2000).
67. Sato, M. *et al.* Myocardial protection with red wine extract. *J Cardiovasc Pharmacol* **35**, 263–8 (2000).
68. Ray, P. S. *et al.* The red wine antioxidant resveratrol protects isolated rat hearts from ischemia reperfusion injury. *Free Radic Biol Med* **27**, 160–9 (1999).
69. Su, H. C., Hung, L. M. & Chen, J. K. Resveratrol, a red wine antioxidant, possesses an insulin-like effect in streptozotocin-induced diabetic rats. *Am J Physiol Endocrinol Metab* (2006).

**Reports that resveratrol causes a significant improvement of the phenotype in a rat model of the diabetes, improving glucose and triglyceride metabolism, and preventing overeating.**

70. Aluru, N. & Vijayan, M. M. Ah receptor activation impairs cortisol response to stress in rainbow trout by disrupting the rate limiting steps in steroidogenesis. *Endocrinology* (2006).
71. Supornsilchai, V., Svechnikov, K., Seidlova-Wuttke, D., Wuttke, W. & Soder, O. Phytoestrogen resveratrol suppresses steroidogenesis by rat adrenocortical cells by inhibiting cytochrome P450 c21-hydroxylase. *Horm Res* **64**, 280–6 (2005).
72. Gao, D. *et al.* Resveratrol reduces the elevated level of MMP-9 induced by cerebral ischemia-reperfusion in mice. *Life Sci* (2005).
73. Kaplan, S., Bisleri, G., Morgan, J. A., Cheema, F. H. & Oz, M. C. Resveratrol, a natural red wine polyphenol, reduces ischemia-reperfusion-induced spinal cord injury. *Ann Thorac Surg* **80**, 2242–9 (2005).
74. Celik, O., Erdem, G., Hascalik, S., Karakas, H. M. & Tamsir, M. Magnetic resonance spectroscopic comparison of the effects of resveratrol (3, 4', 5-trihydroxy stilbene) to conjugated equine estrogen, tibolone and raloxifene on ovariectomized rat brains. *Eur J Obstet Gynecol Reprod Biol* **120**, 73–9 (2005).
75. Wang, Q. *et al.* Resveratrol protects against neurotoxicity induced by kainic acid. *Neurochem Res* **29**, 2105–12 (2004).
76. Inoue, H. *et al.* Brain protection by resveratrol and fenofibrate against stroke requires peroxisome proliferator-activated receptor alpha in mice. *Neurosci Lett* **352**, 203–6 (2003).
77. Seidman, M., Babu, S., Tang, W., Naem, E. & Quirk, W. S. Effects of resveratrol on acoustic trauma. *Otolaryngol Head Neck Surg* **129**, 463–70 (2003).
78. Wang, Y. J., He, F. & Li, X. L. [The neuroprotection of resveratrol in the experimental cerebral ischemia]. *Zhonghua Yi Xue Za Zhi* **83**, 534–6 (2003).
79. Yang, Y. B. & Piao, Y. J. Effects of resveratrol on secondary damages after acute spinal cord injury in rats. *Acta Pharmacol Sin* **24**, 703–10 (2003).
80. Yang, Y. & Piao, Y. [Effects of resveratrol on Ca<sup>2+</sup>, Mg(2+)-ATPase activities after spinal cord trauma in rats]. *Zhong Yao Cai* **25**, 882–5 (2002).
81. Sharma, M. & Gupta, Y. K. Chronic treatment with trans resveratrol prevents intracerebroventricular streptozotocin induced cognitive impairment and oxidative stress in rats. *Life Sci* **71**, 2489–98 (2002).
82. Lugarini, F., Hrupka, B. J., Schwartz, G. J., Plata-Salaman, C. R. & Langhans, W. A role for cyclooxygenase-2 in lipopolysaccharide-induced anorexia in rats. *Am J Physiol Regul Integr Comp Physiol* **283**, R862–8 (2002).
83. Sinha, K., Chaudhary, G. & Gupta, Y. K. Protective effect of resveratrol against oxidative stress in middle cerebral artery occlusion model of stroke in rats. *Life Sci* **71**, 655–65 (2002).
84. Wang, Q. *et al.* Resveratrol protects against global cerebral ischemic injury in gerbils. *Brain Res* **958**, 439–47 (2002).
85. Gupta, Y. K., Chaudhary, G. & Srivastava, A. K. Protective effect of resveratrol against pentylentetrazole-induced seizures and its modulation by an adenosinergic system. *Pharmacology* **65**, 170–4 (2002).
86. Gupta, Y. K., Briyal, S. & Chaudhary, G. Protective effect of trans-resveratrol against kainic acid-induced seizures and oxidative stress in rats. *Pharmacol Biochem Behav* **71**, 245–9 (2002).
87. Gupta, Y. K., Chaudhary, G., Sinha, K. & Srivastava, A. K. Protective effect of resveratrol against intracortical FeCl<sub>3</sub>-induced model of posttraumatic seizures in rats. *Methods Find Exp Clin Pharmacol* **23**, 241–4 (2001).
88. Huang, S. S., Tsai, M. C., Chih, C. L., Hung, L. M. & Tsai, S. K. Resveratrol reduction of infarct size in Long-Evans rats subjected to focal cerebral ischemia. *Life Sci* **69**, 1057–65 (2001).
89. Virgili, M. & Contestabile, A. Partial neuroprotection of *in vivo* excitotoxic brain damage by chronic administration of the red wine antioxidant agent, trans-resveratrol in rats. *Neurosci Lett* **281**, 123–6 (2000).
90. Valenzano, D. R. *et al.* Resveratrol prolongs lifespan and retards the onset of age-related markers in a short-lived vertebrate. *Curr Biol* **16**, 296–300 (2006).

**A study showing that resveratrol can extend lifespan and delay neurodegeneration in vertebrates, although sirtuin-dependence of the effect is not addressed.**

91. Li, Z. D., Ma, Q. Y. & Wang, C. A. Effect of resveratrol on pancreatic oxygen free radicals in rats with severe acute pancreatitis. *World J Gastroenterol* **12**, 137–40 (2006).
92. Ma, Z. H. *et al.* Effect of resveratrol on peritoneal macrophages in rats with severe acute pancreatitis. *Inflamm Res* **54**, 522–7 (2005).
93. Chander, V. & Chopra, K. Protective effect of nitric oxide pathway in resveratrol renal ischemia-reperfusion injury in rats. *Arch Med Res* **37**, 19–26 (2006).
94. Sharma, S., Anjaneyulu, M., Kulkarni, S. K. & Chopra, K. Resveratrol, a polyphenolic phytoalexin, attenuates diabetic nephropathy in rats. *Pharmacology* **76**, 69–75 (2006).
95. Chander, V. & Chopra, K. Possible Role of Nitric Oxide in the Protective Effect of Resveratrol in 5/6th Nephrectomized Rats. *J Surg Res* (2005).
96. Chander, V. & Chopra, K. Role of nitric oxide in resveratrol-induced renal protective effects of ischemic preconditioning. *J Vasc Surg* **42**, 1198–205 (2005).
97. Uguralp, S., Usta, U. & Mizrak, B. Resveratrol may reduce apoptosis of rat testicular germ cells after experimental testicular torsion. *Eur J Pediatr Surg* **15**, 333–6 (2005).
98. McClintock, S. D. *et al.* Attenuation of half sulfur mustard gas-induced acute lung injury in rats. *J Appl Toxicol* (2005).
99. Ara, C. *et al.* Protective effect of resveratrol against oxidative stress in cholestasis. *J Surg Res* **127**, 112–7 (2005).
100. Ara, C. *et al.* Protective effect of resveratrol against renal oxidative stress in cholestasis. *Ren Fail* **27**, 435–40 (2005).
101. Lawinski, M. *et al.* Does resveratrol prevent free radical-induced acute pancreatitis? *Pancreas* **31**, 43–7 (2005).
102. Uguralp, S., Mizrak, B. & Bay Karabulut, A. Resveratrol reduces ischemia reperfusion injury after experimental testicular torsion. *Eur J Pediatr Surg* **15**, 114–9 (2005).
103. Chander, V., Tirkey, N. & Chopra, K. Resveratrol, a polyphenolic phytoalexin protects against cyclosporine-induced nephrotoxicity through nitric oxide dependent mechanism. *Toxicology* **210**, 55–64 (2005).
104. Liu, Z. P. *et al.* Effects of trans-resveratrol from *Polygonum cuspidatum* on bone loss using the ovariectomized rat model. *J Med Food* **8**, 14–9 (2005).
105. Saito, M. *et al.* Effects of a phenolic compound, resveratrol, on the renal function and costimulatory adhesion molecule CD86 expression in rat kidneys with ischemia/reperfusion injury. *Arch Histol Cytol* **68**, 41–9 (2005).
106. Juan, M. E. *et al.* trans-Resveratrol, a natural antioxidant from grapes, increases sperm output in healthy rats. *J Nutr* **135**, 757–60 (2005).
107. Hebbar, V. *et al.* Toxicogenomics of resveratrol in rat liver. *Life Sci* **76**, 2299–314 (2005).
108. Meng, Y., Zhang, M., Xu, J., Liu, X. M. & Ma, Q. Y. Effect of resveratrol on microcirculation disorder and lung injury following severe acute pancreatitis in rats. *World J Gastroenterol* **11**, 433–5 (2005).
109. Megli, F. M. & Sabatini, K. Mitochondrial phospholipid bilayer structure is ruined after liver oxidative injury *in vivo*. *FEBS Lett* **573**, 68–72 (2004).
110. Korolkiewicz, R. P. *et al.* The role and interactions of nitric oxide (NO), carbon monoxide (CO), and prostanooids in the pathogenesis of postoperative ileus in rats. *J Gastrointest Surg* **8**, 346–57 (2004).
111. Martin, A. R., Villegas, I., La Casa, C. & de la Lastra, C. A. Resveratrol, a polyphenol found in grapes, suppresses oxidative damage and stimulates apoptosis during early colonic inflammation in rats. *Biochem Pharmacol* **67**, 1399–410 (2004).
112. Korolkiewicz, R. P. *et al.* Differential salutary effects of nonselective and selective COX-2 inhibitors in postoperative ileus in rats. *J Surg Res* **109**, 161–9 (2003).
113. Morales, A. I. *et al.* Protective effect of trans-resveratrol on gentamicin-induced nephrotoxicity. *Antioxid Redox Signal* **4**, 893–8 (2002).
114. Juan, M. E. & Planas, J. M. Trans-resveratrol oral administration does not affect the enzymatic activities in rat small intestine. *J Physiol Biochem* **58**, 59–60 (2002).
115. McClintock, S. D., Till, G. O., Smith, M. G. & Ward, P. A. Protection from half-mustard-gas-induced acute lung injury in the rat. *J Appl Toxicol* **22**, 257–62 (2002).
116. Bertelli, A. A. *et al.* Resveratrol, a component of wine and grapes, in the prevention of kidney disease. *Ann N Y Acad Sci* **957**, 230–8 (2002).
117. Juan, M. E., Vinardell, M. P. & Planas, J. M. The daily oral administration of high doses of trans-resveratrol to rats for 28 days is not harmful. *J Nutr* **132**, 257–60 (2002).
118. Nihei, T., Miura, Y. & Yagasaki, K. Inhibitory effect of resveratrol on proteinuria, hypoalbuminemia and hyperlipidemia in nephritic rats. *Life Sci* **68**, 2845–52 (2001).
119. Giovannini, L. *et al.* Resveratrol, a polyphenol found in wine, reduces ischemia reperfusion injury in rat kidneys. *J Cardiovasc Pharmacol* **37**, 262–70 (2001).
120. Cadenas, S. & Barja, G. Resveratrol, melatonin, vitamin E, and PBN protect against renal oxidative DNA damage induced by the kidney carcinogen KBrO<sub>3</sub>. *Free Radic Biol Med* **26**, 1531–7 (1999).

121. Jang, M. & Pezzuto, J. M. Effects of resveratrol on 12-O-tetradecanoylphorbol-13-acetate-induced oxidative events and gene expression in mouse skin. *Cancer Lett* **134**, 81–9 (1998).
122. Warzecha, Z. *et al.* Ischemic preconditioning inhibits development of edematous cerulein-induced pancreatitis: Involvement of cyclooxygenases and heat shock protein 70. *World J Gastroenterol* **11**, 5958–65 (2005).
123. Pajdo, R. *et al.* Ischemic preconditioning, the most effective gastroprotective intervention: involvement of prostaglandins, nitric oxide, adenosine and sensory nerves. *Eur J Pharmacol* **427**, 263–76 (2001).
124. Konturek, S. J. *et al.* Gastric preconditioning induced by short ischemia: the role of prostaglandins, nitric oxide and adenosine. *Med Sci Monit* **7**, 610–21 (2001).
125. Jaworek, J. *et al.* Involvement of cyclooxygenase-derived prostaglandin E2 and nitric oxide in the protection of rat pancreas afforded by low dose of lipopolysaccharide. *J Physiol Pharmacol* **52**, 107–26 (2001).
126. Brzozowski, T. *et al.* Expression of cyclooxygenase (COX)-1 and COX-2 in adaptive cytoprotection induced by mild stress. *J Physiol Paris* **94**, 83–91 (2000).
127. Chen, G. *et al.* Synthesis and anti-inflammatory activity of resveratrol analogs. *Chem Pharm Bull (Tokyo)* **53**, 1587–90 (2005).
128. Docherty, J. J. *et al.* Effect of resveratrol on herpes simplex virus vaginal infection in the mouse. *Antiviral Res* **67**, 155–62 (2005).
129. Wu, S. L., Yu, L., Meng, K. W., Ma, Z. H. & Pan, C. E. Resveratrol prolongs allograft survival after liver transplantation in rats. *World J Gastroenterol* **11**, 4745–9 (2005).
130. Wu, S. L., Pan, C. E., Yu, L. & Meng, K. W. Immunosuppression by combined use of cyclosporine and resveratrol in a rat liver transplantation model. *Transplant Proc* **37**, 2354–9 (2005).
131. Elmali, N. *et al.* Effect of resveratrol in experimental osteoarthritis in rabbits. *Inflamm Res* **54**, 158–62 (2005).
132. Birrell, M. A. *et al.* Resveratrol, an extract of red wine, inhibits lipopolysaccharide induced airway neutrophilia and inflammatory mediators through an NF-kappaB-independent mechanism. *Faseb J* (2005).
133. Meng, Y., Ma, Q. Y., Kou, X. P. & Xu, J. Effect of resveratrol on activation of nuclear factor kappa-B and inflammatory factors in rat model of acute pancreatitis. *World J Gastroenterol* **11**, 525–8 (2005).
134. Docherty, J. J., Smith, J. S., Fu, M. M., Stoner, T. & Booth, T. Effect of topically applied resveratrol on cutaneous herpes simplex virus infections in hairless mice. *Antiviral Res* **61**, 19–26 (2004).
135. Gao, X. *et al.* Immunomodulatory activity of resveratrol: discrepant *in vitro* and *in vivo* immunological effects. *Biochem Pharmacol* **66**, 2427–35 (2003).
136. Feng, Y. H. *et al.* Low dose of resveratrol enhanced immune response of mice. *Acta Pharmacol Sin* **23**, 893–7 (2002).
137. Alattar, M. H. *et al.* Sepsis-induced alteration in T-cell Ca(2+) signaling in neonatal rats. *Biol Neonate* **80**, 300–4 (2001).
138. Brzozowski, T. *et al.* Classic NSAID and selective cyclooxygenase (COX)-1 and COX-2 inhibitors in healing of chronic gastric ulcers. *Microsc Res Tech* **53**, 343–53 (2001).
139. Brzozowski, T. *et al.* Role of prostaglandins generated by cyclooxygenase-1 and cyclooxygenase-2 in healing of ischemia-reperfusion-induced gastric lesions. *Eur J Pharmacol* **385**, 47–61 (1999).
140. Granados-Soto, V., Arguelles, C. F. & Ortiz, M. I. The peripheral antinociceptive effect of resveratrol is associated with activation of potassium channels. *Neuropharmacology* **43**, 917–23 (2002).
141. Torres-Lopez, J. E. *et al.* Comparison of the antinociceptive effect of celecoxib, diclofenac and resveratrol in the formalin test. *Life Sci* **70**, 1669–76 (2002).
142. Gentilli, M. *et al.* Resveratrol decreases hyperalgesia induced by carrageenan in the rat hind paw. *Life Sci* **68**, 1317–21 (2001).
143. Hascalik, S., Celik, O., Tamser, M. & Mizrak, B. Effects of resveratrol, raloxifene, tibolone and conjugated equine estrogen on vaginal squamous cell maturation of ovariectomized rats. *Gynecol Obstet Invest* **60**, 186–91 (2005).
144. Nikaido, Y. *et al.* Effects of prepubertal exposure to xenoestrogen on development of estrogen target organs in female CD-1 mice. *In Vivo* **19**, 487–94 (2005).
145. Nikaido, Y. *et al.* Effects of maternal xenoestrogen exposure on development of the reproductive tract and mammary gland in female CD-1 mouse offspring. *Reprod Toxicol* **18**, 803–11 (2004).
146. Kyselova, V., Peknicova, J., Buckiova, D. & Boubelik, M. Effects of p-nonylphenol and resveratrol on body and organ weight and *in vivo* fertility of outbred CD-1 mice. *Reprod Biol Endocrinol* **1**, 30 (2003).
147. Kubo, K. *et al.* Low dose effects of bisphenol A on sexual differentiation of the brain and behavior in rats. *Neurosci Res* **45**, 345–56 (2003).
148. Liu, Z., Yu, B., Li, W. & Sun, J. [Estrogenicity of trans-resveratrol in immature mice *in vivo*]. *Wei Sheng Yan Jiu* **31**, 188–90 (2002).
149. Henry, L. A. & Witt, D. M. Resveratrol: phytoestrogen effects on reproductive physiology and behavior in female rats. *Horm Behav* **41**, 220–8 (2002).
150. Freyberger, A., Hartmann, E., Hildebrand, H. & Krotlinger, F. Differential response of immature rat uterine tissue to ethinylestradiol and the red wine constituent resveratrol. *Arch Toxicol* **74**, 709–15 (2001).

151. Mizutani, K., Ikeda, K., Kawai, Y. & Yamori, Y. Resveratrol attenuates ovariectomy-induced hypertension and bone loss in stroke-prone spontaneously hypertensive rats. *J Nutr Sci Vitaminol (Tokyo)* **46**, 78–83 (2000).
152. Turner, R. T., Evans, G. L., Zhang, M., Maran, A. & Sibonga, J. D. Is resveratrol an estrogen agonist in growing rats? *Endocrinology* **140**, 50–4 (1999).
